# Supplementary material for: Evidence of non-tandemly repeated rDNAs and their intragenomic heterogeneity in Rhizophagus irregularis
Source: PubMed Central journal article supplement (PMC6123716; doi:10.1038/s42003-018-0094-7), 2018-07-10
Supplement: 42003_2018_94_MOESM1_ESM.pdf [file 42003_2018_94_MOESM1_ESM.pdf]

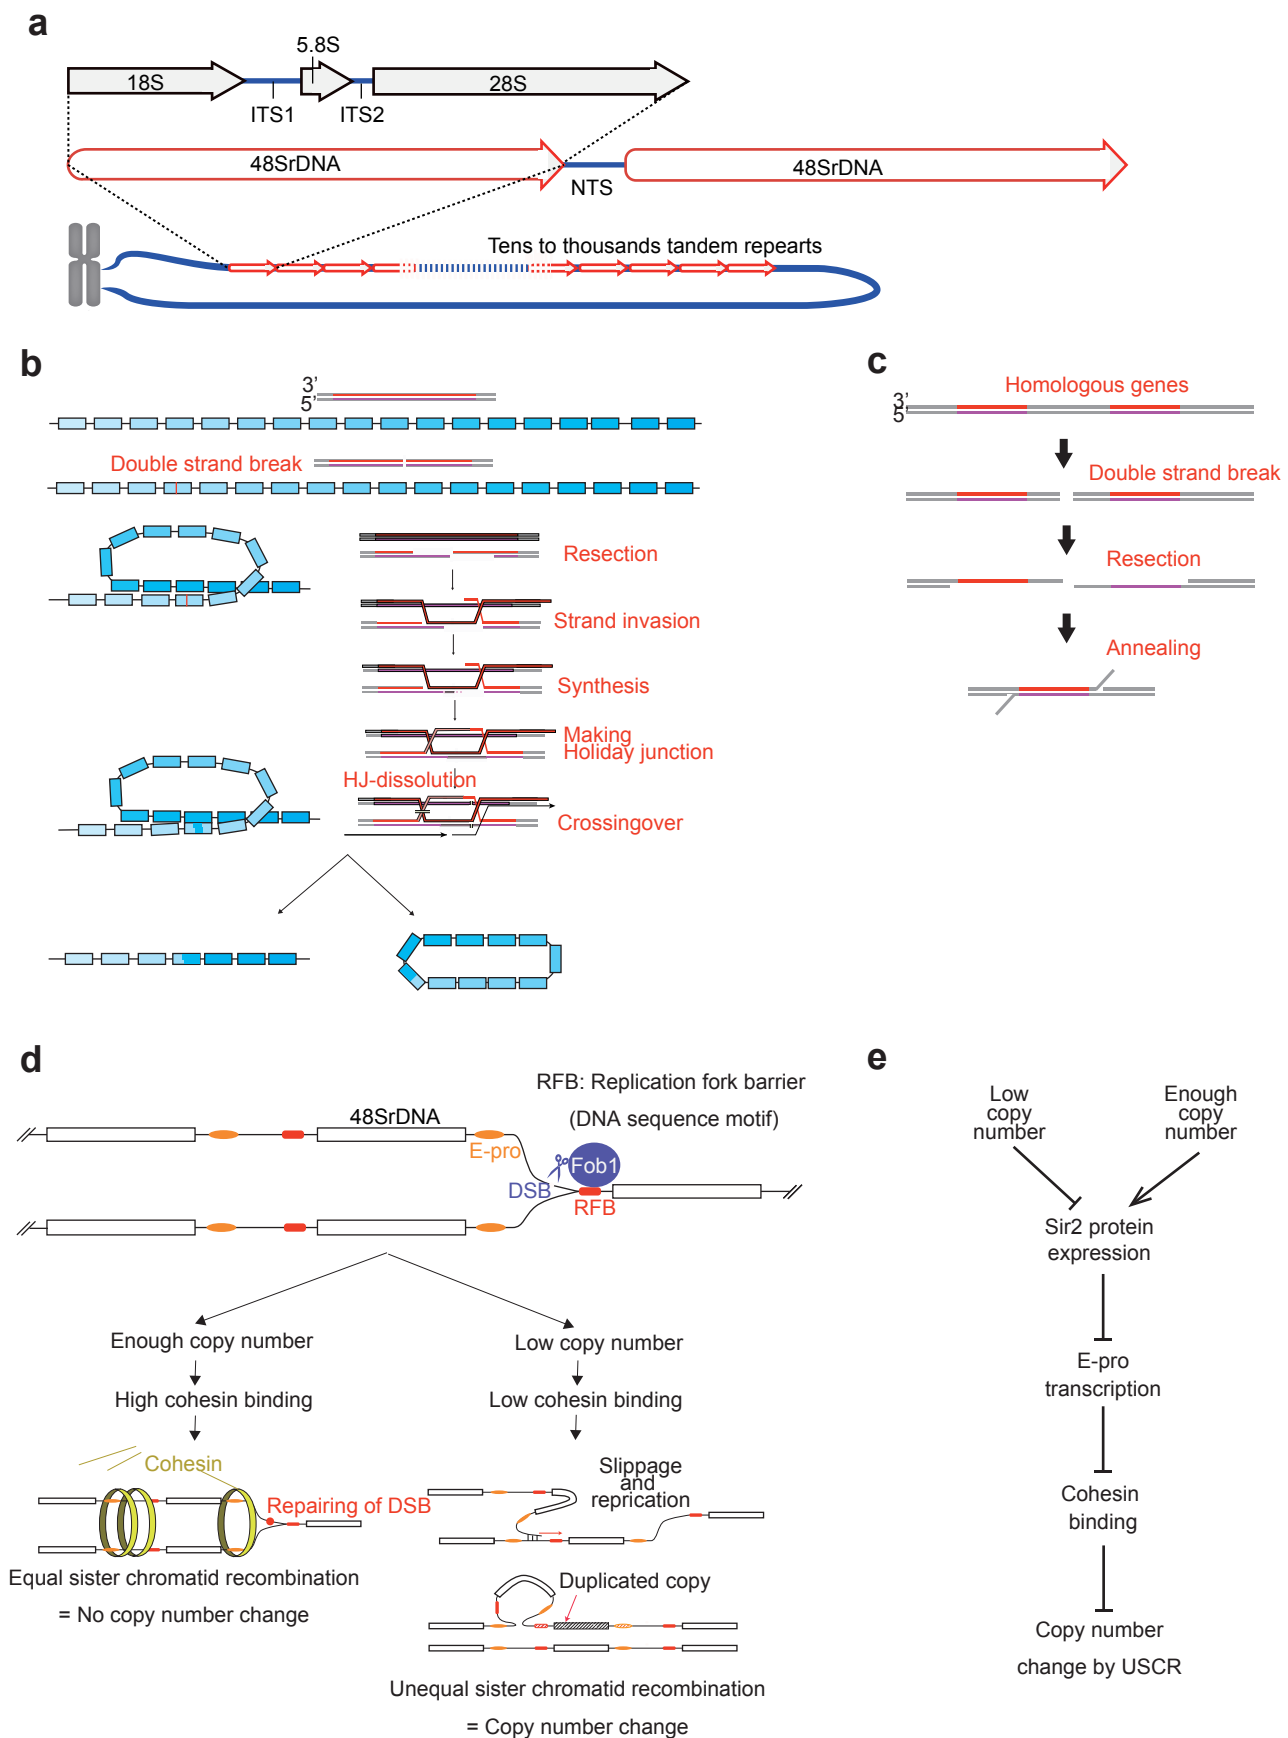

### Supplementary Figure 1. General concerted evolution of eukaryotic rDNA

**a.** A general structure of eukaryotic rDNA clusters<sup>20</sup>. **b.** Deletion of homologous genes by crossover recombination<sup>33,58</sup>. **c.** Deletion of homologous genes by single-strand annealing<sup>34</sup>. **d.** A model of the rDNA number maintenance system<sup>32</sup>. **e.** Copy number-controlling pathway in yeast<sup>32</sup>.

### Gene models exclude “Provisional” models

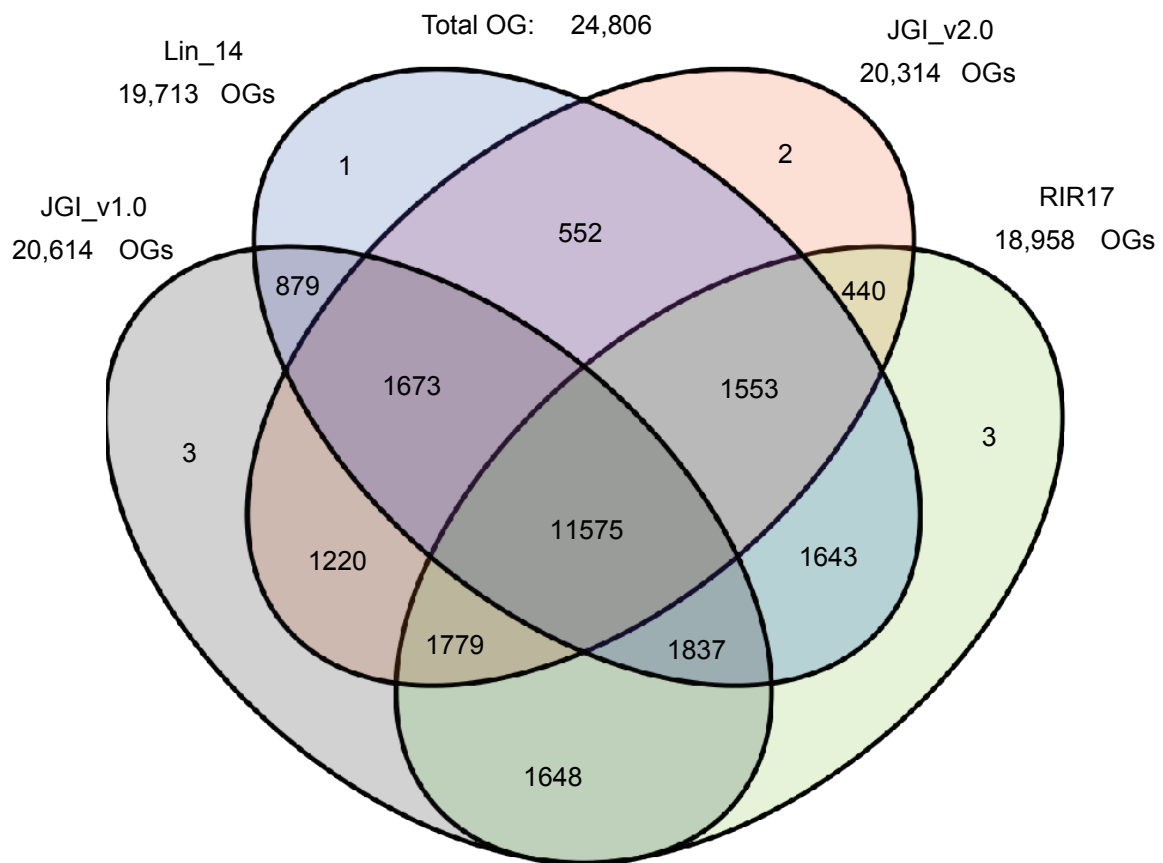

### All gene models including “Provisional” models

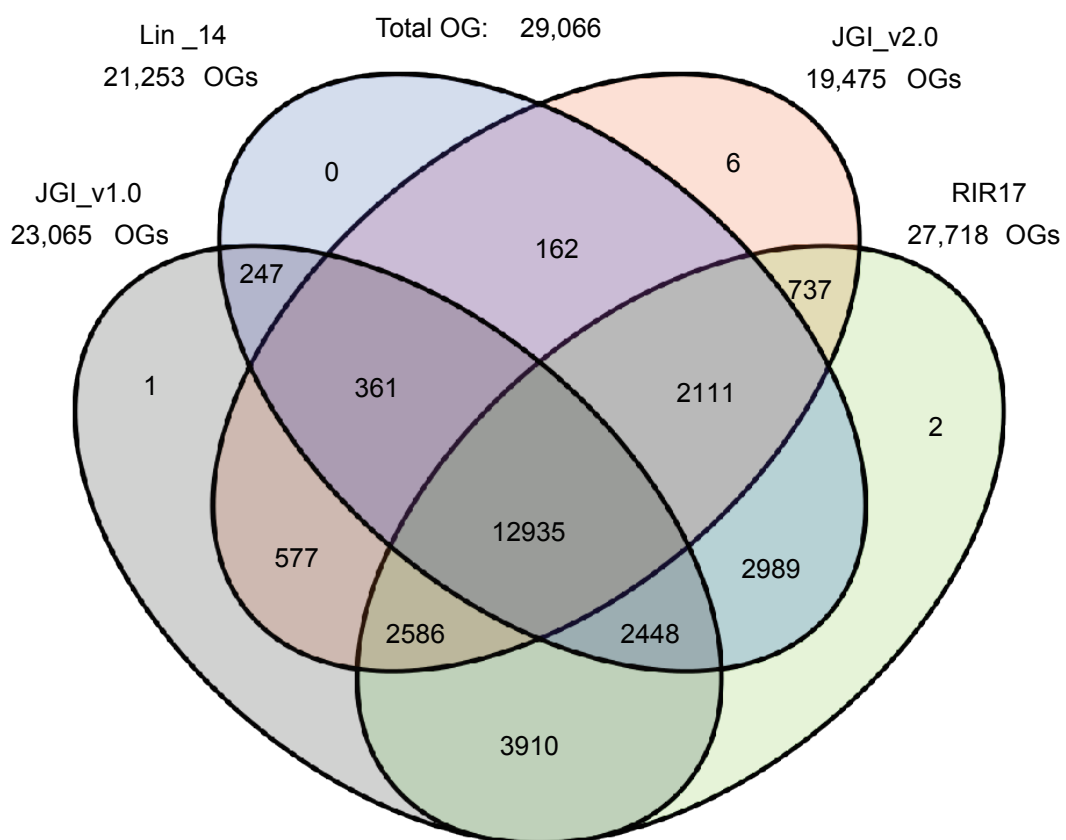

Supplementary Figure 2. Cross comparison of *R. irregularis* DAOM-18160219 orthologous genes from three genomic studies and our RIR17 assemblies.

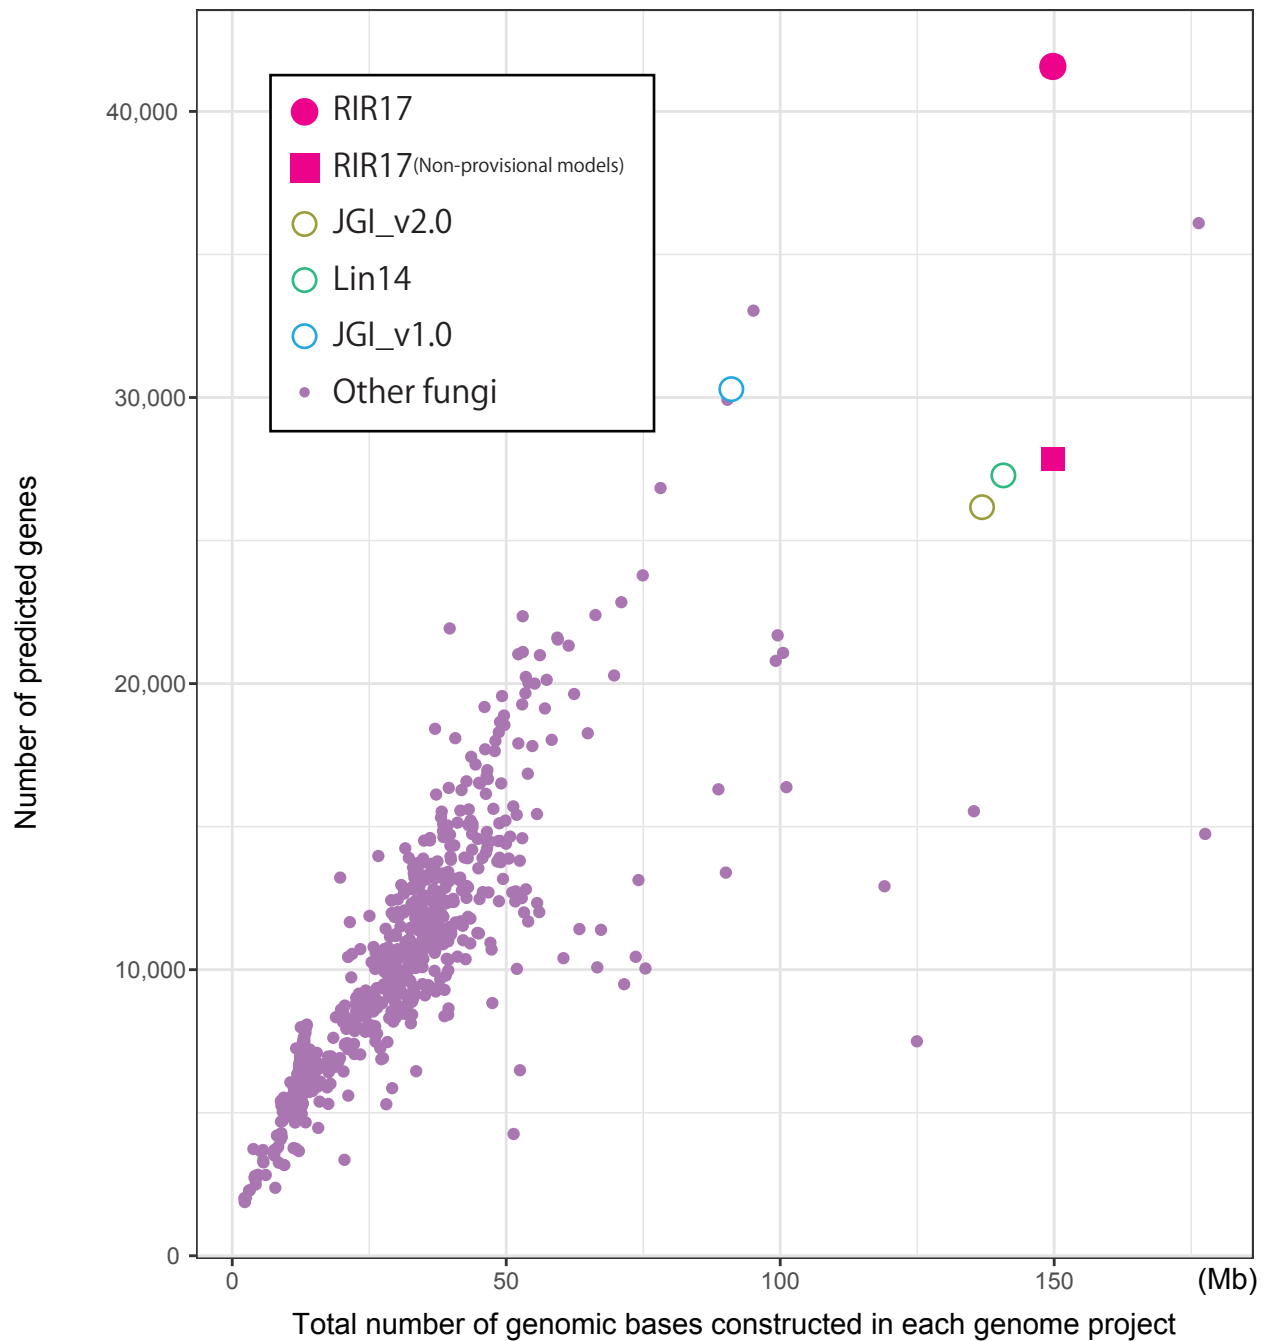

**Supplementary Figure 3. Total assembly size and predicted gene number in fungi.**

*Rhizophagus irregularis* genomes (RIR17 and three previously assembled genomes, JGI\_v1.0, JGI\_v2.0 and Lin14) and 768 genomes registered in GenBank. The fungal assembly statistics were obtained from the registered information in GenBank ([ftp://ftp.ncbi.nlm.nih.gov/genomes/ASSEMBLY\\_REPORTS/All/](ftp://ftp.ncbi.nlm.nih.gov/genomes/ASSEMBLY_REPORTS/All/)).

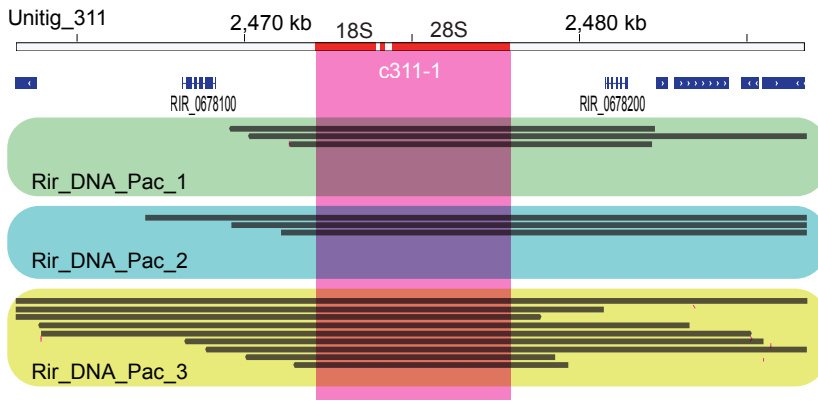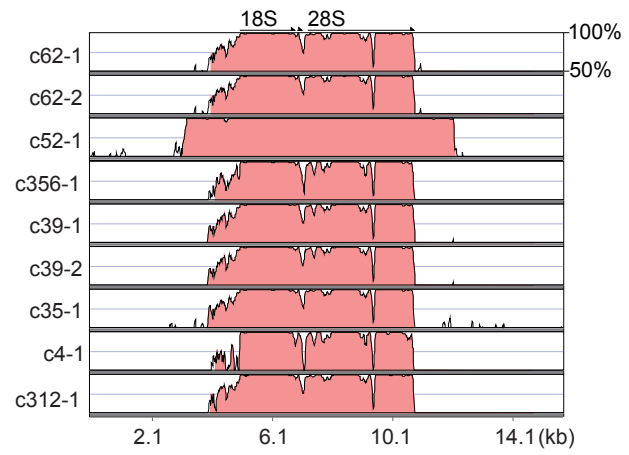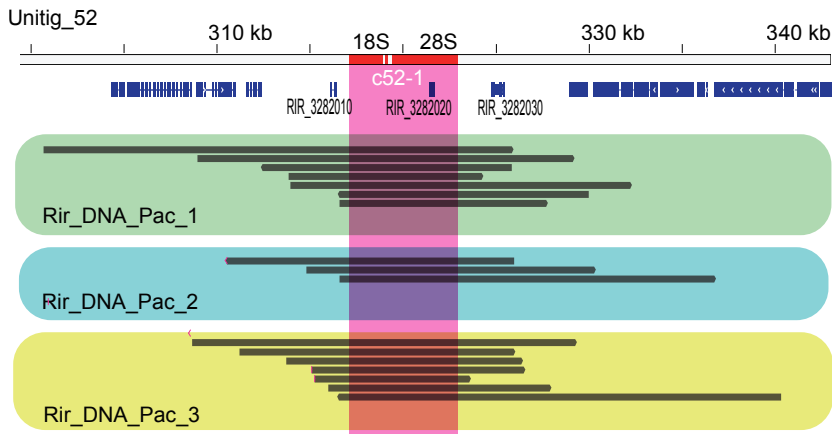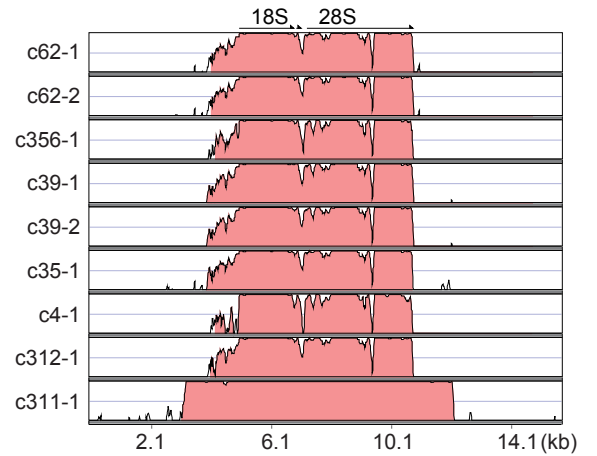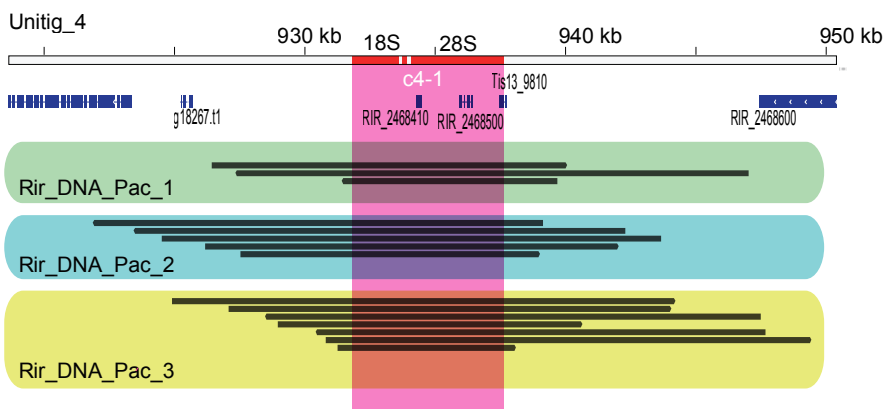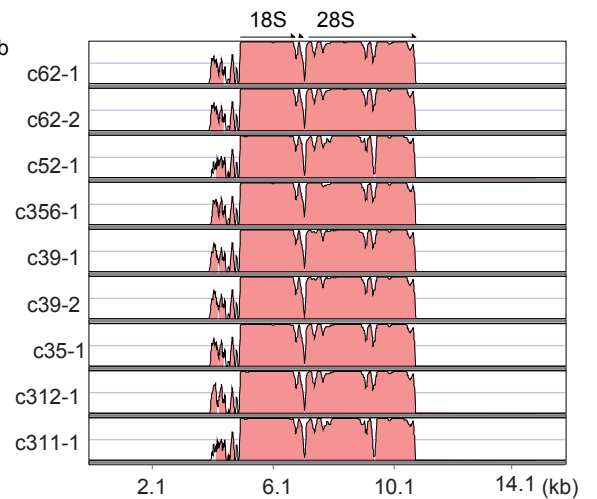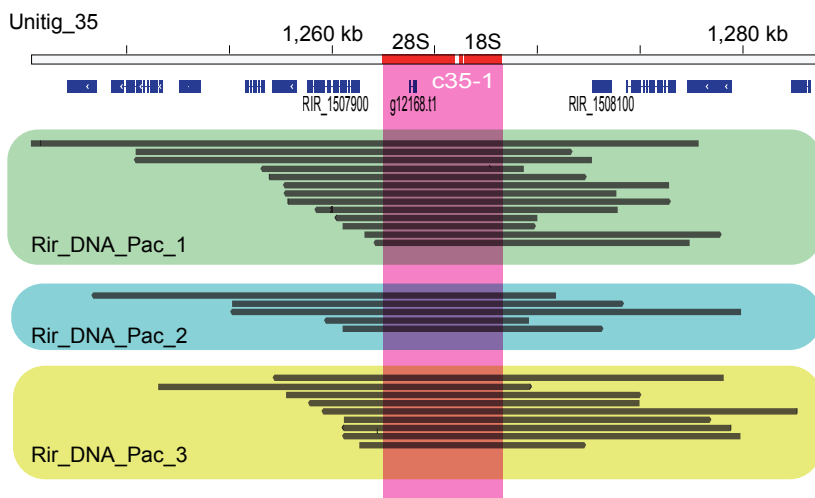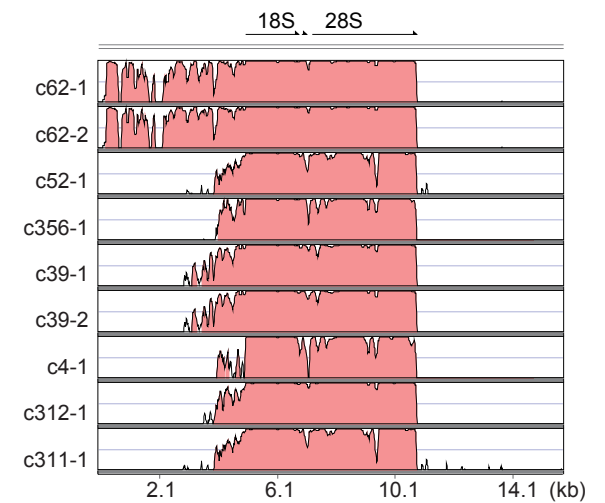

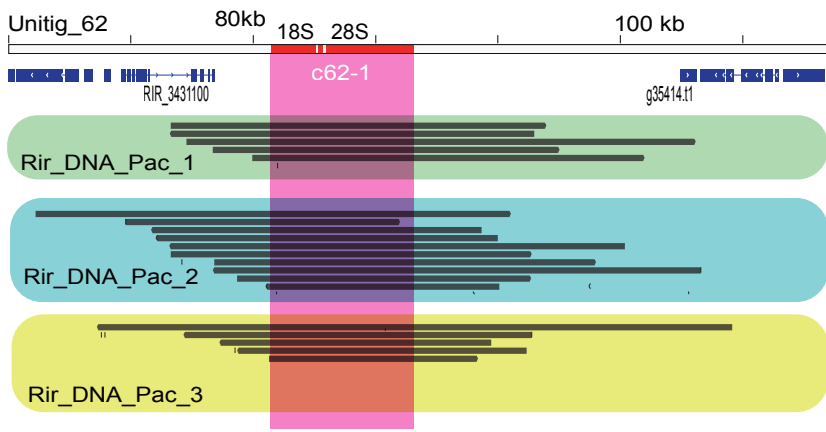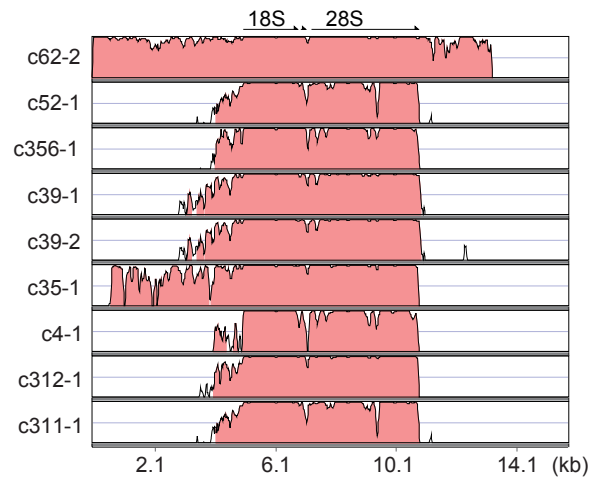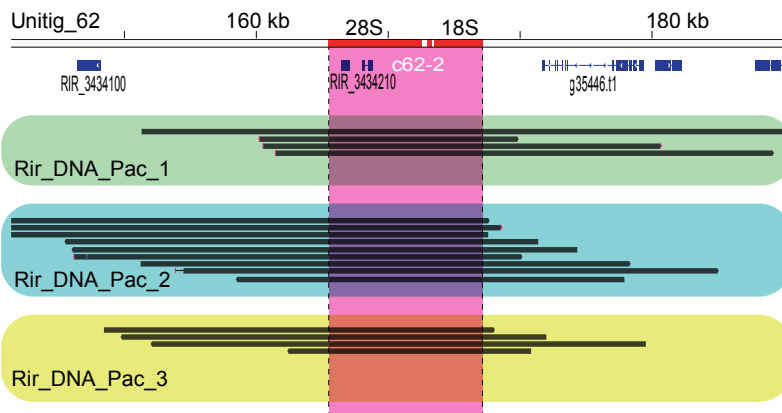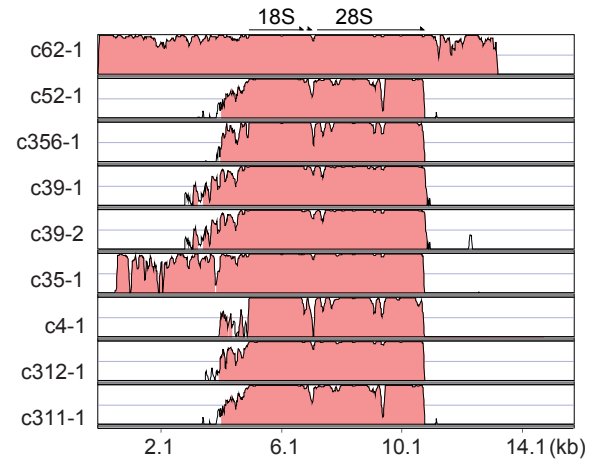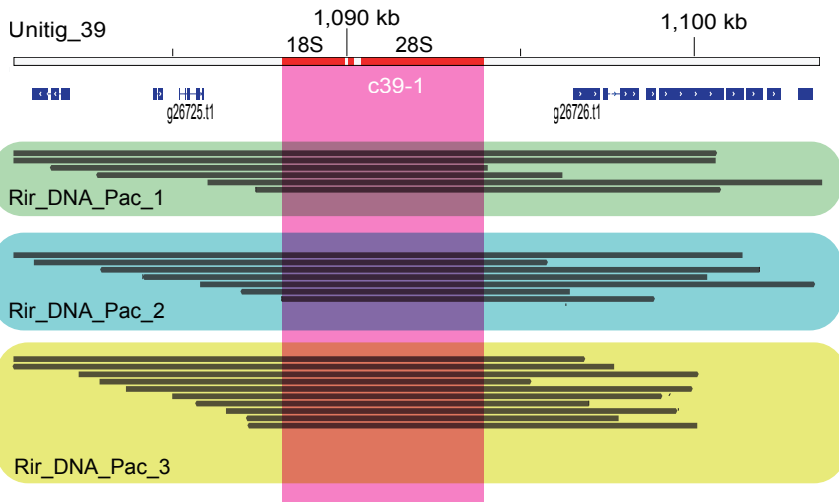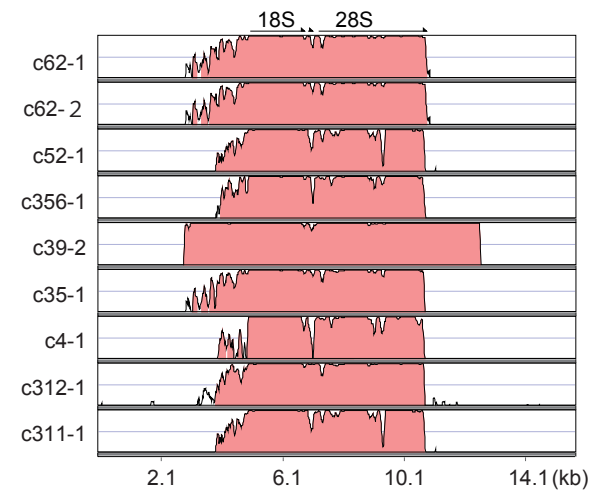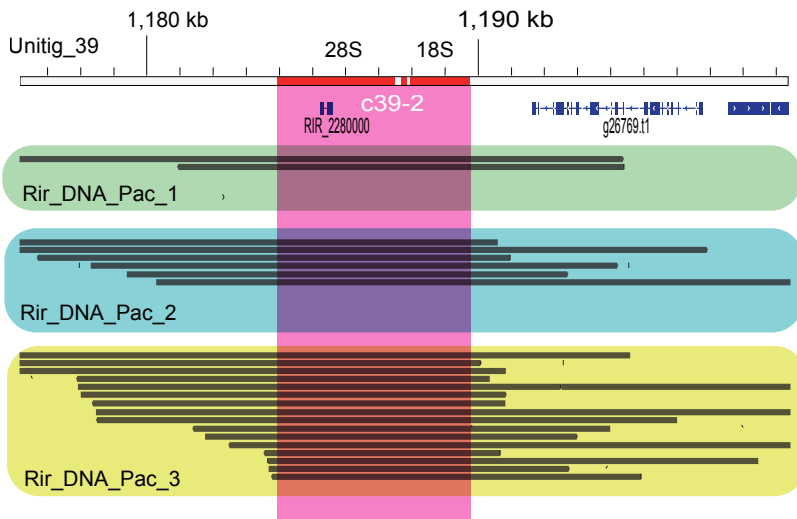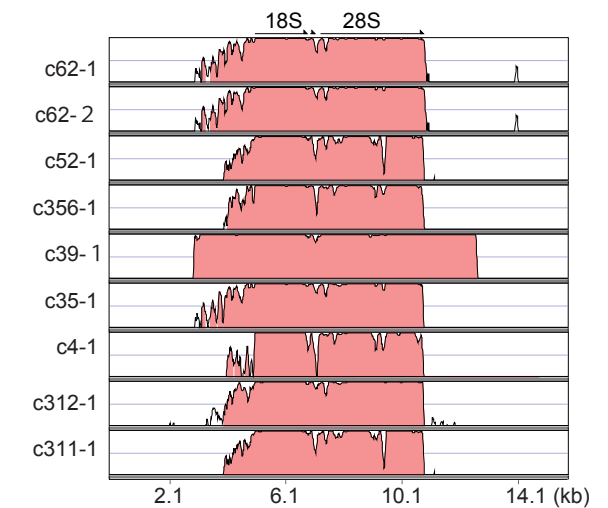

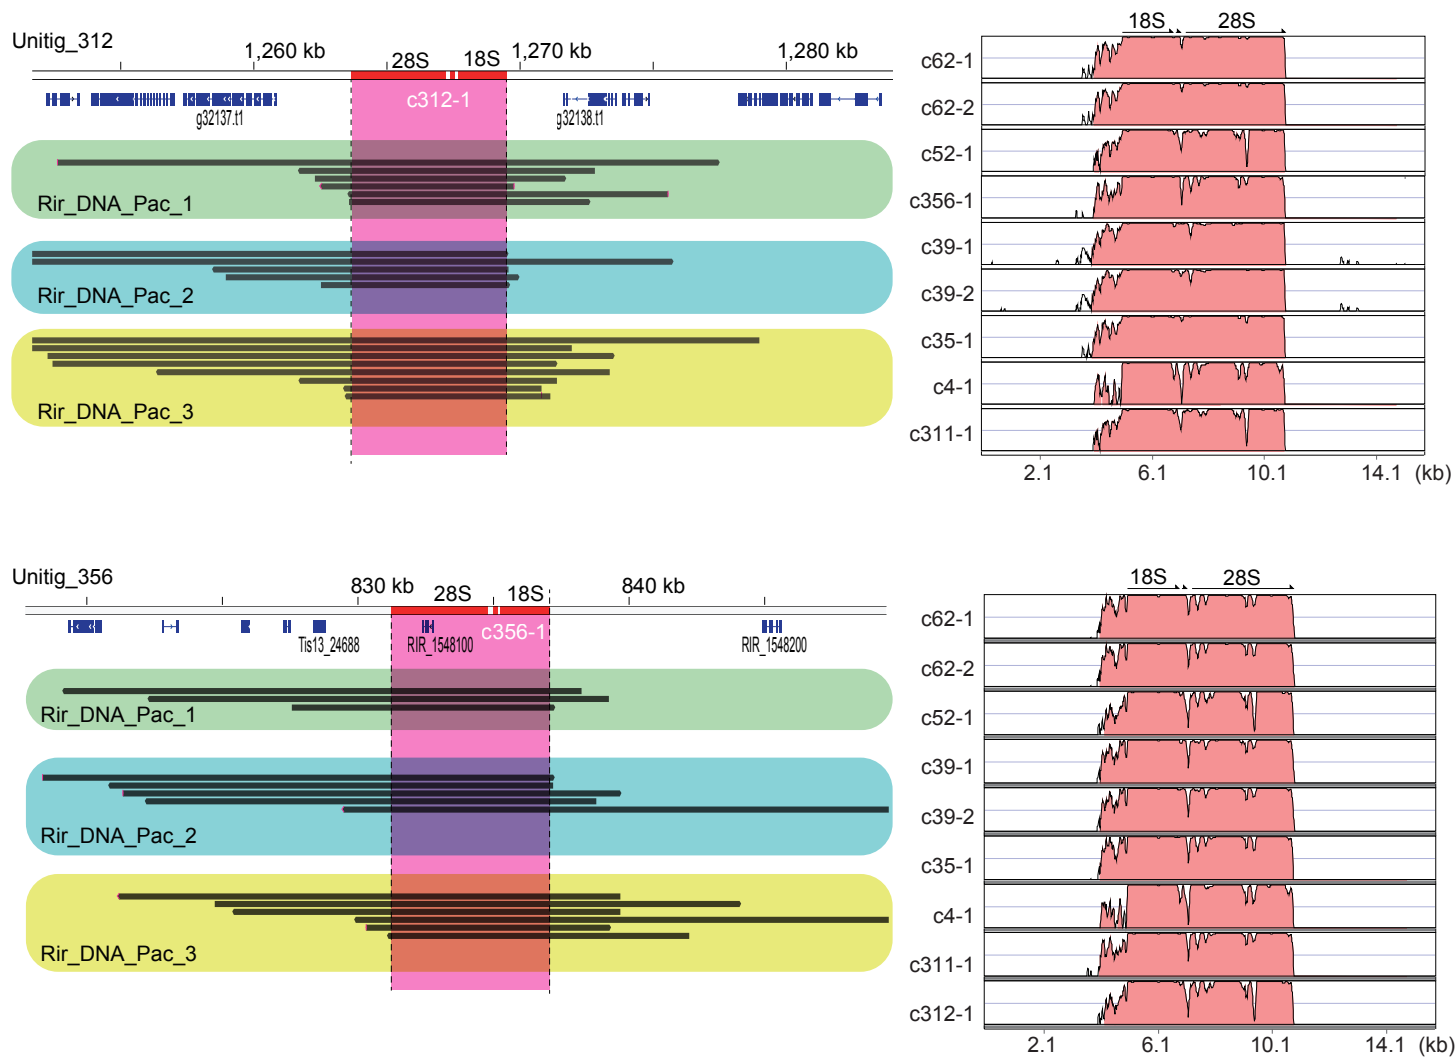

**Supplementary Figure 4. Mapped PacBio reads of rDNA regions of RIR17 contigs and the sequence similarity of rDNAs with other rDNA regions in RIR17**

The colors have the same meanings as in Fig. 3a-b.

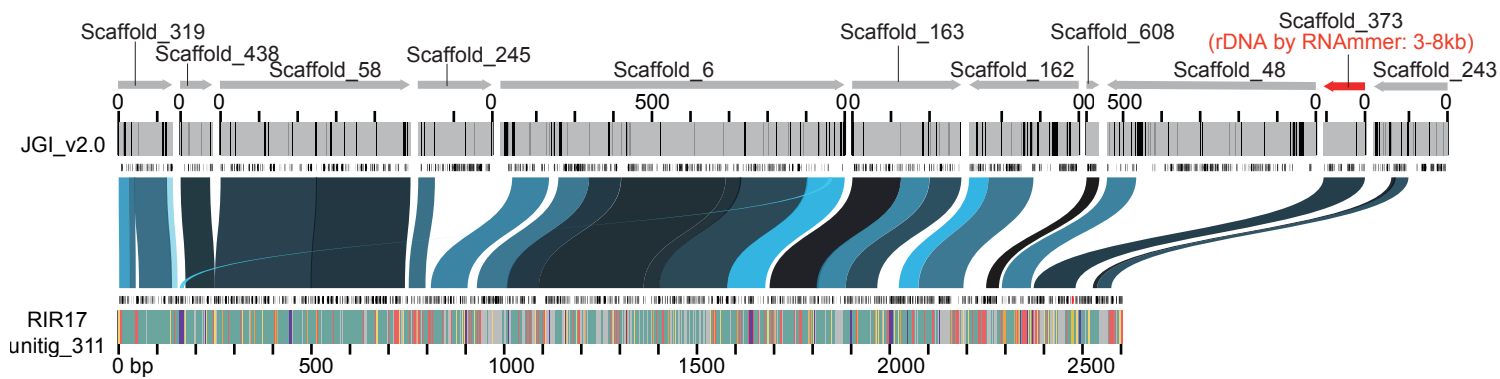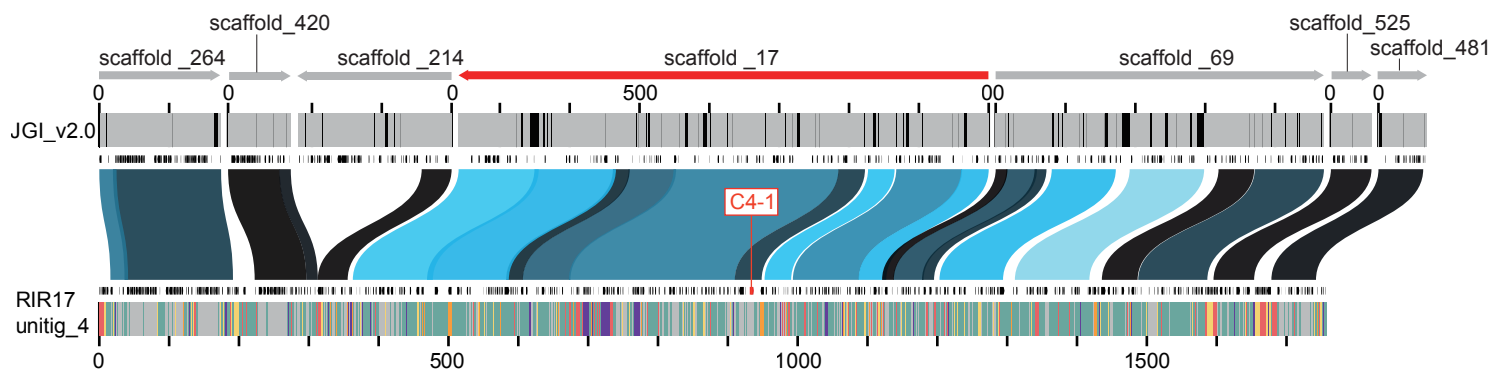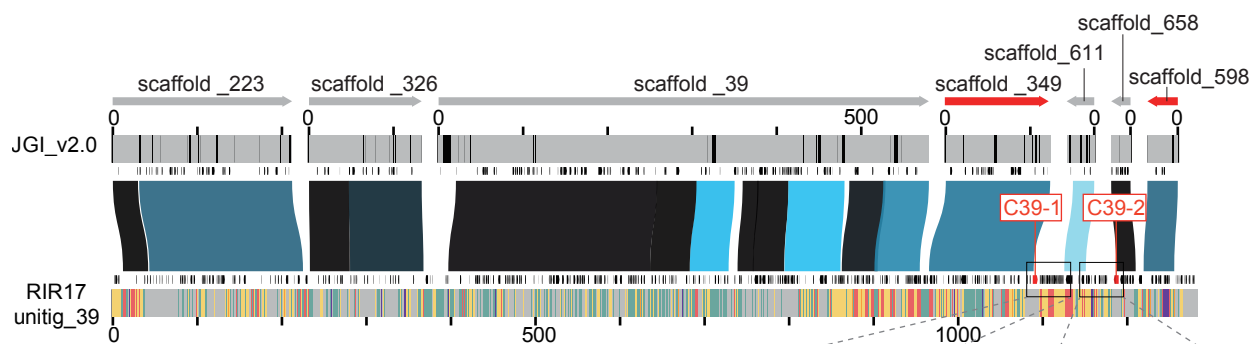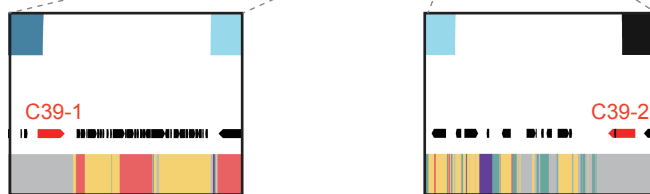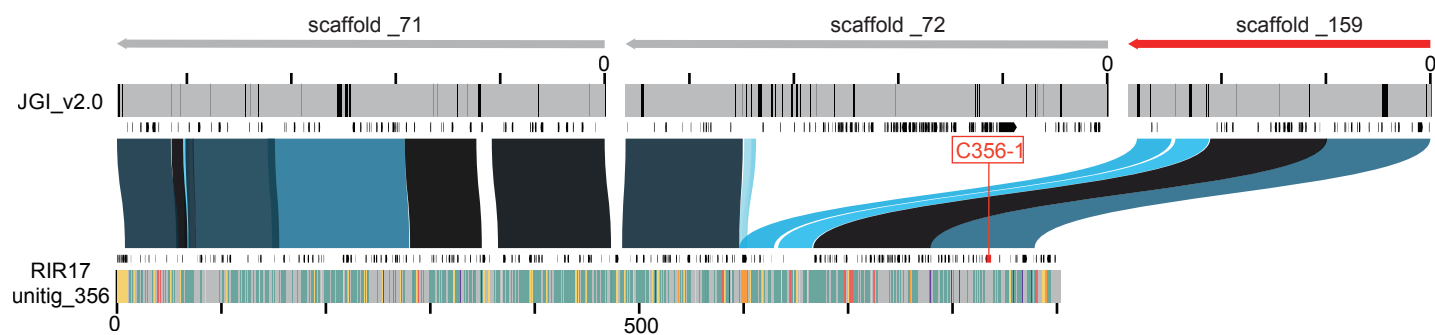

(Continued)

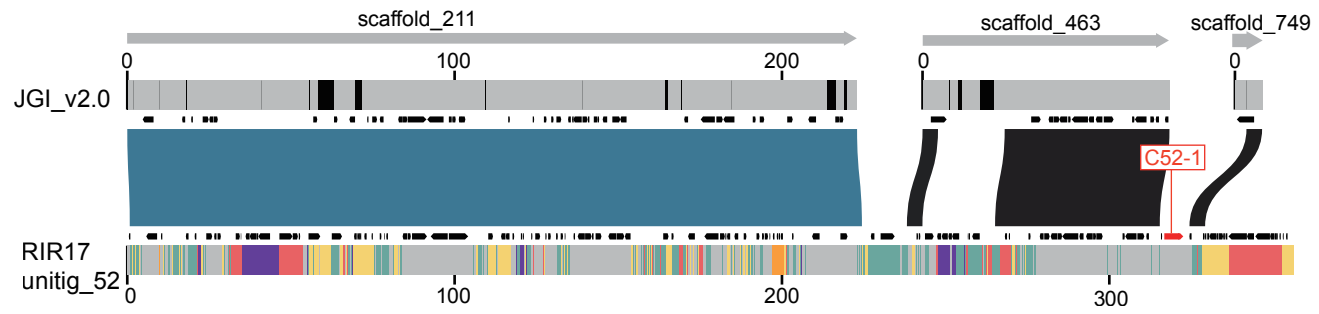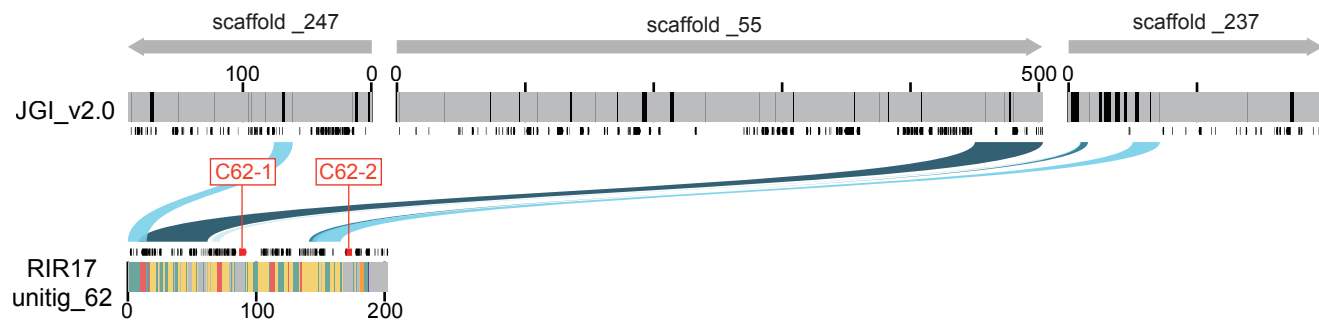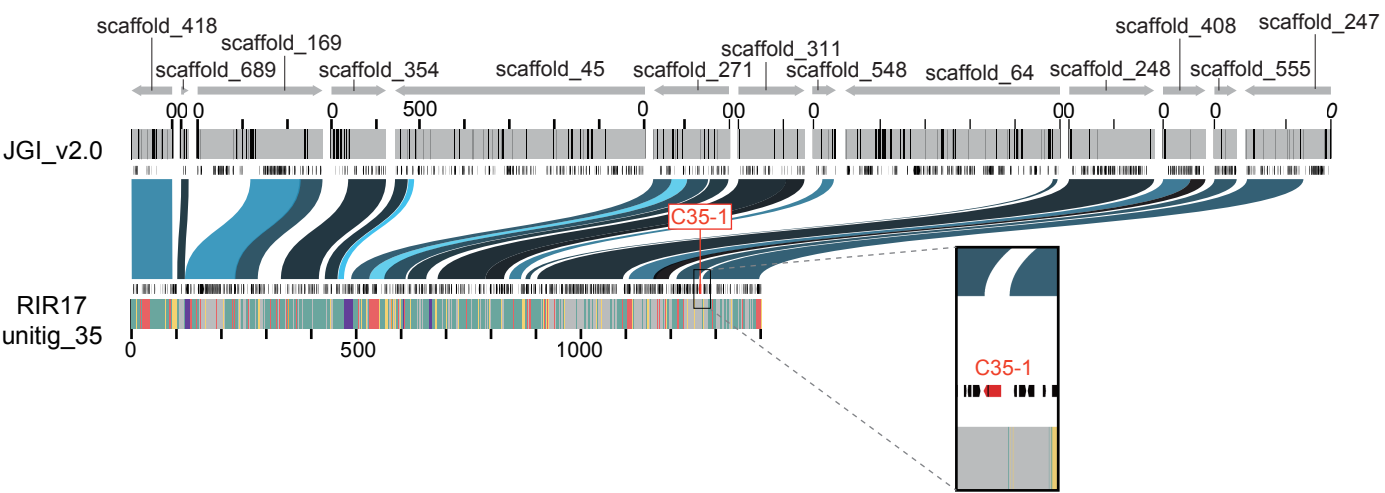

**Supplementary Figure 5. Positions and identities of JGI\_v2.0 scaffold aligned against RIR17 contigs with rDNAs.**

The colors have the same meanings as in Figure 3c.



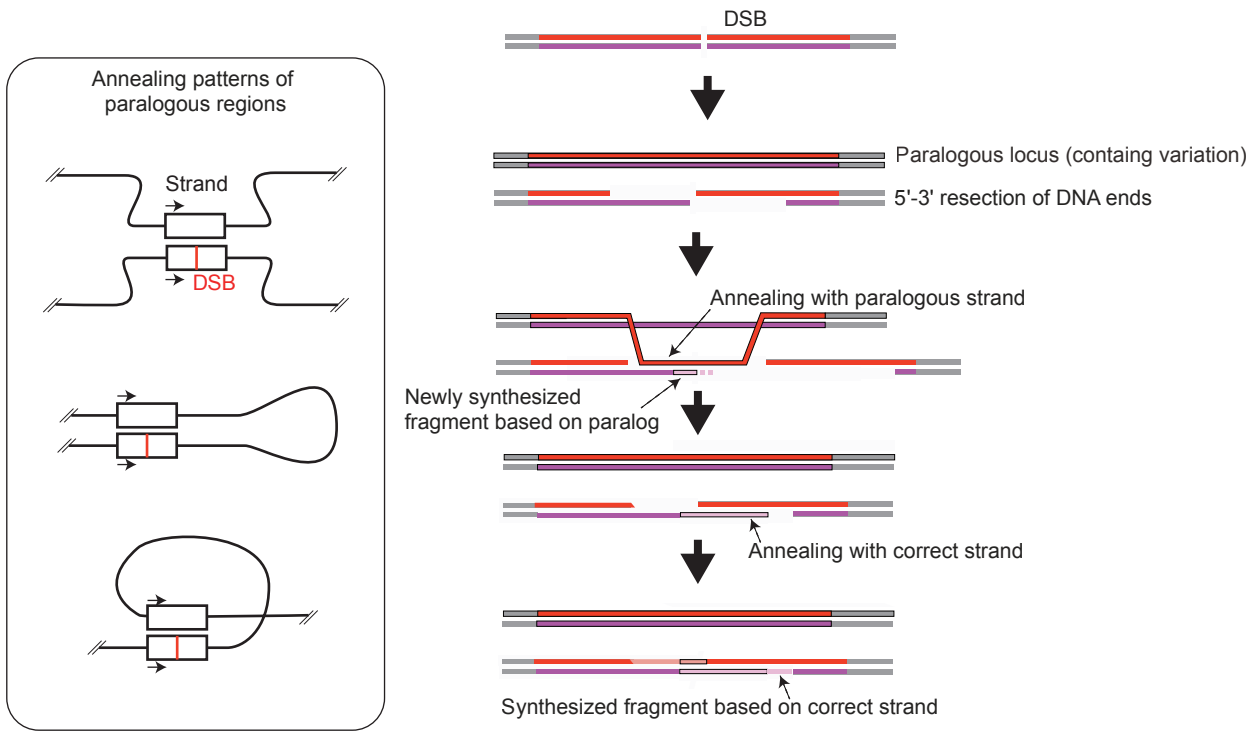

**Supplementary Figure 6. Synthesis-dependent strand annealing**

**Supplementary Table 1. Assmby statistics of *R. irregularis* genomes**

| Assmby ID | Reference             | IDs in public database<br>(database)     | # assembly | Total length | % total<br>length | # N's<br>base | N50 (bp)  | Longest<br>assembly | CEGMA<br>completenss* |      |
|-----------|-----------------------|------------------------------------------|------------|--------------|-------------------|---------------|-----------|---------------------|-----------------------|------|
|           |                       |                                          |            |              |                   |               |           |                     | Detected<br>gene #    | %    |
| RIR17     | -                     | BDIQ01000000<br>(INSDC)                  | 210        | 149,750,837  | 97.24             | 0             | 2,308,146 | 5,727,599           | 244                   | 98.4 |
| JGI_v2.0  | Chen et a. 2018       | Rhizophagus irregulare v2.0<br>(MycCosm) | 1,123      | 136,807,476  | 88.84             | 6,925,426     | 336,373   | 1,375,864           | 245                   | 98.8 |
| Lin_14    | Lin et al. 2014       | JEMT00000000<br>(INSDC)                  | 30,233     | 140,695,967  | 91.36             | 30,115        | 16,434    | 198,953             | 229                   | 92.3 |
| JGI_v1.0  | Tisserant et al. 2013 | Rhizophagus irregulare v1.0<br>(MycCosm) | 28,371     | 91,083,792   | 59.15             | 270,422       | 4,186     | 57,883              | 241                   | 97.2 |

\*All CEGMA restuls was obtained by our reanalysis on CEGMA

**Supplementary Table 2. Summary of the sequencing data**

| Sequence ID   | DRA ID    | Libraly construction and sequencing method | DNA/RNA | Read #      | Read length | Total basepair (Mbp) |
|---------------|-----------|--------------------------------------------|---------|-------------|-------------|----------------------|
| Rir_DNA_Pac_1 | DRA004849 | PacBio RSII, P6-C4 sequence chemistry      | DNA     | 348,539     | *7559       | 2,635                |
| Rir_DNA_Pac_2 | DRA004878 | PacBio RSII, P6-C4 sequence chemistry      | DNA     | 394,261     | *8562       | 3,376                |
| Rir_DNA_Pac_3 | DRA004889 | PacBio RSII, P6-C4 sequence chemistry      | DNA     | 761,112     | *7500       | 5,708                |
| Rir_DNA_PE180 | DRA004835 | Hiseq PE126,TruSeq DNA prep kit            | DNA     | 423,041,682 | 126         | 53,303               |
| Rir_RNA_SS    | DRA005204 | Hiseq PE101,TruSeq RNA prep kit            | RNA     | 32,245,928  | 101         | 3,257                |
| Rir_RNA_rRNA  | DRA006039 | Miseq PE301,TruSeq RNA prep kit            | RNA     | 20,904,594  | 301         | 6,292                |

\*Average read length

**Supplementary Table 3. Blast hit data of eliminated contamination sequences**

Query; Illumina-polished assmbly, Database; Refseq genome, blast; default blastn search

| Assmby ID  | Hit ID       | Assmby length | Identity % | Query cover % | Max bit score | Total score | E-value | Subject title                                                                                                                             |
|------------|--------------|---------------|------------|---------------|---------------|-------------|---------|-------------------------------------------------------------------------------------------------------------------------------------------|
| unitig_103 | NW_016089427 | 4223          | 99         | 100           | 7548          | 25444       | 0       | <i>Daucus carota</i> subsp. <i>sativus</i> cultivar DH1 unplaced genomic scaffold, ASM162521v1 DCARv2_B11, whole genome shotgun sequence  |
| unitig_228 | NC_030383    | 2192          | 93         | 100           | 3208          | 87603       | 0       | <i>Daucus carota</i> subsp. <i>sativus</i> cultivar DH1 chromosome 3, ASM162521v1, whole genome shotgun sequence                          |
| unitig_85  | NW_016092113 | 14490         | 99         | 99            | 10975         | 106600      | 0       | <i>Daucus carota</i> subsp. <i>sativus</i> cultivar DH1 unplaced genomic scaffold, ASM162521v1 DCARv2_S316, whole genome shotgun sequence |
| unitig_109 | NW_016089417 | 1602          | 99         | 100           | 2826          | 52864       | 0       | <i>Daucus carota</i> subsp. <i>sativus</i> cultivar DH1 chromosome 2 genomic scaffold, ASM162521v1 2, whole genome shotgun sequence       |
| unitig_88  | NW_016092113 | 14867         | 98         | 100           | 11607         | 90386       | 0       | <i>Daucus carota</i> subsp. <i>sativus</i> cultivar DH1 unplaced genomic scaffold, ASM162521v1 DCARv2_S316, whole genome shotgun sequence |
| unitig_100 | NW_016089417 | 8259          | 94         | 100           | 12676         | 539700      | 0       | <i>Daucus carota</i> subsp. <i>sativus</i> cultivar DH1 chromosome 2 genomic scaffold, ASM162521v1 2, whole genome shotgun sequence       |
| unitig_83  | NW_016092113 | 46670         | 98         | 100           | 11686         | 328700      | 0       | <i>Daucus carota</i> subsp. <i>sativus</i> cultivar DH1 unplaced genomic scaffold, ASM162521v1 DCARv2_S316, whole genome shotgun sequence |
| unitig_84  | NW_016092113 | 14454         | 98         | 100           | 11673         | 103600      | 0       | <i>Daucus carota</i> subsp. <i>sativus</i> cultivar DH1 unplaced genomic scaffold, ASM162521v1 DCARv2_S316, whole genome shotgun sequence |
| unitig_101 | NC_030388    | 3879          | 95         | 100           | 6058          | 146300      | 0       | <i>Daucus carota</i> subsp. <i>sativus</i> cultivar DH1 chromosome 8, ASM162521v1, whole genome shotgun sequence                          |

**Supplementary Table 4. Statistics of Mummer alignment**

|                     |                | RIR17 vs JGI2 |             | RIR17 vs Lin14 |             | RIR17 vs JGI v1.0 |            | JGI v2.0 vs Lin14 |             | JGI v2.0 vs JGI v1.0 |            |
|---------------------|----------------|---------------|-------------|----------------|-------------|-------------------|------------|-------------------|-------------|----------------------|------------|
|                     |                | RIR17         | JGI v2.0    | RIR17          | Lin14       | RIR17             | JGI v1.0   | JGI v2.0          | Lin14       | JGI v2.0             | JGI v1.0   |
| Assmby #            | Total query    | 210           | 1,123       | 210            | 30233       | 210               | 28,371     | 1,123             | 30,233      | 1,123                | 28,371     |
|                     | Aligned        | 181           | 1,118       | 184            | 29,346      | 171               | 27,941     | 1,097             | 29,222      | 1,039                | 27,911     |
|                     | Unaligned      | 29            | 5           | 26             | 887         | 39                | 430        | 26                | 1,011       | 84                   | 460        |
| Total bases         |                | 149,750,837   | 136,807,476 | 149,750,837    | 140,695,967 | 149,750,837       | 91,083,792 | 136,807,476       | 140,695,967 | 136,807,476          | 91,083,792 |
| bp                  |                | 141,467,912   | 129,748,697 | 135,095,707    | 139,499,930 | 102,512,435       | 89,901,367 | 123,572,251       | 137,934,367 | 100,065,708          | 89,599,127 |
| Bases               | % for total    |               |             |                |             |                   |            |                   |             |                      |            |
|                     | Aligned bases  | 94.47%        | 94.84%      | 90.21%         | 99.15%      | 68.46%            | 98.70%     | 90.33%            | 98.04%      | 73.14%               | 98.37%     |
|                     | bp             | 8,282,925     | 7,058,779   | 14,655,130     | 1,196,037   | 47,238,402        | 1,182,425  | 13,235,225        | 2,761,600   | 36,741,768           | 1,484,665  |
| % for total         |                |               |             |                |             |                   |            |                   |             |                      |            |
| Unaligned bases     |                | 5.53%         | 5.16%       | 9.79%          | 0.85%       | 31.54%            | 1.30%      | 9.67%             | 1.96%       | 26.86%               | 1.63%      |
| Breakpoints         |                | 57,007        | 53,835      | 109,568        | 45,089      | 116,992           | 45,979     | 138,441           | 85,178      | 118,725              | 51,951     |
| Syntenic difference | Relocations    | 982           | 622         | 219            | 82          | 4                 | 48         | 668               | 238         | 68                   | 79         |
|                     | Translocations | 1,980         | 1,101       | 19,502         | 766         | 28,807            | 1,129      | 17,489            | 1,908       | 28,316               | 1,629      |
|                     | Translocations | 34            | 64          | 445            | 551         | 2                 | 39         | 395               | 487         | 4                    | 17         |
| SNP*                |                | 29,960        |             | 9,655          |             | 30,347            |            | 24,699            |             | 32,729               |            |
| INDEL               |                | 14,608        |             | 17,081         |             | 21,267            |            | 2,622             |             | 14,112               |            |

\*Supported by 20 bp over sequence identifier around the detected position

**Supplementary Table 5. Predicted gene number and BUSCO completeness of *R. irregularis* DAOM-181602 genomes**

|                          | Gene mode<br>(Longest isoform) |             | Isoform model |             | Complete<br>BUSCOs<br>(S+D) |      | Complete and<br>single-copy<br>BUSCOs (S) |      | Complete and<br>duplicated<br>BUSCOs (D) |      | Fragmented<br>BUSCOs |      | Missing<br>BUSCOs |     |
|--------------------------|--------------------------------|-------------|---------------|-------------|-----------------------------|------|-------------------------------------------|------|------------------------------------------|------|----------------------|------|-------------------|-----|
|                          | #                              | Average     | #             | Average     | #                           | %    | #                                         | %    | #                                        | %    | #                    | %    | #                 | %   |
|                          |                                | length (AA) |               | length (AA) |                             |      |                                           |      |                                          |      |                      |      |                   |     |
| RIR17                    | 41,572                         | 377         | 43,675        | 378         | 273                         | 94.1 | 243                                       | 83.8 | 30                                       | 10.3 | 11                   | 3.8  | 6                 | 2.1 |
| RIR17<br>Non-provisional | 27,859                         | 448         | 29,849        | 446         | 273                         | 94.1 | 243                                       | 83.8 | 30                                       | 10.3 | 11                   | 3.8  | 6                 | 2.1 |
| JGI v2.0                 | 26,183                         | 326         | -             | -           | 282                         | 97.2 | 274                                       | 94.5 | 8                                        | 2.8  | 2                    | 0.7  | 6                 | 2.1 |
| Lin14                    | 27,301                         | 347         | 29,911        | 351         | 256                         | 88.3 | 186                                       | 64.1 | 70                                       | 24.1 | 7                    | 2.4  | 27                | 9.3 |
| JGI v1.0                 | 30,282                         | 270         | -             | -           | 257                         | 88.6 | 251                                       | 86.6 | 6                                        | 2.1  | 29                   | 10.0 | 4                 | 1.4 |

**Supplementary Table 6. Number of genes on repetitive regions**

|                            | Total gene number | Genes on repetitive region | Genes on transposon |       |       |         | Total transposon | Other repetitive region | Genes on non-repetitive region |
|----------------------------|-------------------|----------------------------|---------------------|-------|-------|---------|------------------|-------------------------|--------------------------------|
|                            |                   |                            | LINE                | LTR   | DNA   | unknown |                  |                         |                                |
| RIR17                      | 41,572            | 32,665                     | 3,185               | 1,735 | 8,065 | 15,287  | 24,185           | 8,480                   | 8,907                          |
| RIR17 Non-provisional gene | 27,859            | 22,455                     | 1,462               | 1,290 | 4,354 | 10,361  | 15,099           | 7,356                   | 5,404                          |
| JGI_v2.0                   | 26,183            | 20,106                     | 252                 | 334   | 1,878 | 10,043  | 11,386           | 8,720                   | 6,077                          |

**Supplementary Table 7. Analyzed protein sequences by Orthofinder analysis**

| IDs in Figure 1  | Species name                                | Source                        |
|------------------|---------------------------------------------|-------------------------------|
| Drosophila       | <i>Drosophila melanogaster</i>              | OrthoDB9:Metazoa*             |
| Mus              | <i>Mus musculus</i> 10090                   | OrthoDB9:Metazoa*             |
| Mortierella      | <i>Mortierella elongata</i> AG-77           | INSDC:PRJNA196039             |
| R. irregularis   | <i>Rhizophagus irregularis</i>              | RIR17                         |
| Phycomyces       | <i>Phycomyces blakesleeanus</i>             | INSDC: PRJNA61391             |
| Rhizopus         | <i>Rhizopus delemar</i> RA 99-880           | OrthoDB9:Fungi*               |
| Aspergillus      | <i>Aspergillus nidulans</i> FGSC_A4         | ASpGD (s10-m04-r06)           |
| Saccharomyces    | <i>Saccharomyces cerevisiae</i> S288C       | Saccharomyces Genome Database |
| Agaricus         | <i>Agaricus bisporus</i> var. bisporus      | OrthoDB9:Fungi*               |
| Batrachochytrium | <i>Batrachochytrium dendrobatidis</i> JAM81 | OrthoDB9:Fungi*               |
| Encephalitozoon  | <i>Encephalitozoon cuniculi</i>             | OrthoDB9:Fungi*               |

\*<http://www.orthodb.org/?page=filelist>



**Supplementary Table 8. Blast search of genes involved in the degradation of plant cell wall**

Query; Corresponding gene in *Aspergillus niger*, Database; all of the constructed gene models from RIR17 (for blastp search), or RIR17 genomic sequences (for tblastn search)

| Activity category in CAzy               | CAZy ID | Corresponding gene in <i>Aspergillus niger</i> CBS 513.88 (Genbank ID) | Blastp (e-value < 1E-4) | tBlastn (e-value < 1E-4) |
|-----------------------------------------|---------|------------------------------------------------------------------------|-------------------------|--------------------------|
|                                         |         | CAK48272                                                               | No-hit                  | No-hit                   |
|                                         | PL4     | CAK46452                                                               | No-hit                  | No-hit                   |
|                                         |         | CAK48551                                                               | No-hit                  | No-hit                   |
|                                         |         | CAK48529                                                               | No-hit                  | No-hit                   |
|                                         |         | CAK48388                                                               | No-hit                  | No-hit                   |
|                                         |         | CAK47350                                                               | No-hit                  | No-hit                   |
|                                         |         | CAK40523                                                               | No-hit                  | No-hit                   |
| Polysaccharide lyases                   | PL1     | CAK37997                                                               | No-hit                  | No-hit                   |
|                                         |         | AAF04492                                                               | No-hit                  | No-hit                   |
|                                         | GH7     | AAF04491                                                               | No-hit                  | No-hit                   |
|                                         |         | CAK41068                                                               | No-hit                  | No-hit                   |
| Cellobiohydrolases                      | GH6     | CAK39856                                                               | No-hit                  | No-hit                   |
|                                         |         | CAK97324                                                               | No-hit                  | No-hit                   |
|                                         |         | CAK97151                                                               | No-hit                  | No-hit                   |
|                                         |         | CAK46515                                                               | No-hit                  | No-hit                   |
|                                         |         | CAK45495                                                               | No-hit                  | No-hit                   |
|                                         |         | CAK42466                                                               | No-hit                  | No-hit                   |
| Lytic polysaccharide mono-oxygenases    | AA9     | CAK41095                                                               | No-hit                  | No-hit                   |
|                                         |         | CAK38942                                                               | No-hit                  | No-hit                   |
|                                         |         | CAK97324                                                               | No-hit                  | No-hit                   |
|                                         |         | CAK46515                                                               | No-hit                  | No-hit                   |
|                                         |         | CAK44069                                                               | No-hit                  | No-hit                   |
|                                         |         | CAK43558                                                               | No-hit                  | No-hit                   |
|                                         |         | CAK42930                                                               | No-hit                  | No-hit                   |
|                                         |         | CAK42466                                                               | No-hit                  | No-hit                   |
| Proteins with cellulose-binding motif 1 | CBM1    | CAK41068                                                               | No-hit                  | No-hit                   |
|                                         |         | AAF04492                                                               | No-hit                  | No-hit                   |

**Supplementary Table 9. Mapped read depth of coverage to RIR17 genes.**

|        | isoform ID            | Mean read depth<br>of coverage* | (rDNA) / (single-copy<br>BUSCOs) |
|--------|-----------------------|---------------------------------|----------------------------------|
| BUSCOs | g15690.t1             | 159.3                           | -                                |
|        | g16450.t1             | 160.3                           | -                                |
|        | g24696.t1             | 157.4                           | -                                |
|        | g13527.t1             | 149.0                           | -                                |
|        | g1455.t1              | 162.1                           | -                                |
|        | g11464.t1             | 153.4                           | -                                |
|        | g13372.t1             | 152.5                           | -                                |
|        | g31539.t1             | 155.3                           | -                                |
|        | g6363.t1              | 146.1                           | -                                |
|        | g11459.t1             | 144.2                           | -                                |
|        | Average of ten BUSCOs | 154.0                           | -                                |
| rDNAs  | rDNA_Consensus_IUPAC  | 1733.3                          | 11.3                             |

\*Calculated by the mapping of DNA short reads (Rir\_DNA\_PE180) to selected ten BUSCO genes and consensus rDNA sequences from ten rDNA paralogs.

**Supplementary Table 10. rDNAs in the previous genome assemblies based on RNAmmer analysis**

| Genome ID | Assmby ID      | rDNA type | Start  | End    | Strand | Score  | Corresponding gene on RIR17* |
|-----------|----------------|-----------|--------|--------|--------|--------|------------------------------|
| JGI_v2.0  | scaffold_373   | 28s_rRNA  | 3428   | 8116   | -      | 3249.9 |                              |
| JGI_v2.0  | scaffold_373   | 18s_rRNA  | 8228   | 10038  | -      | 1495.1 | C311-1                       |
| JGI_v2.0  | scaffold_200   | 18s_rRNA  | 86443  | 88253  | +      | 1494.6 |                              |
| JGI_v2.0  | scaffold_200   | 28s_rRNA  | 88365  | 93099  | +      | 3280.4 | C312-1                       |
| JGI_v2.0  | scaffold_17    | 28s_rRNA  | 187376 | 191935 | -      | 3283.5 |                              |
| JGI_v2.0  | scaffold_17    | 18s_rRNA  | 192047 | 193857 | -      | 1494.6 | C4-1                         |
| JGI_v2.0  | scaffold_658   | 18s_rRNA  | 20153  | 21963  | +      | 1494.8 | C39-2(Partial)               |
| JGI_v2.0  | scaffold_349   | 18s_rRNA  | 122313 | 123445 | +      | 164.4  | C39-1(Partial)               |
| JGI_v2.0  | scaffold_159   | 28s_rRNA  | 45455  | 46835  | +      | 33.9   | C356-1(Partial)              |
| JGI_v1.0  | scaffold_3668  | 28s_rRNA  | 9      | 1305   | -      | 252.7  | Not analysed                 |
| JGI_v1.0  | scaffold_3199  | 18s_rRNA  | 6      | 1498   | +      | 956.7  | Not analysed                 |
| Lin_14    | JEMT01001954.1 | 28s_rRNA  | 4257   | 7785   | -      | 3214.9 | Not analysed                 |
| Lin_14    | JEMT01015073.1 | 18s_rRNA  | 10     | 1068   | -      | 134.7  | Not analysed                 |
| Lin_14    | JEMT01012775.1 | 18s_rRNA  | 1537   | 2892   | +      | 845.2  | Not analysed                 |

\*from mummer alignment

**Supplementary Table 11. Mean intragenomic differences among ten rDNA paralogs**

| Region                | Aligned positions | # difference |       | # indel |       | Percent identity (%) |      |
|-----------------------|-------------------|--------------|-------|---------|-------|----------------------|------|
|                       |                   | Average      | SD    | Average | SD    | Average              | SD   |
| 18SrDNA               | 1811              | 1.58         | 1.09  | 0.47    | 0.50  | 99.91                | 0.06 |
| ITS1                  | 110               | 7.13         | 7.85  | 2.76    | 2.54  | 93.45                | 7.20 |
| 5.8SrDNA              | 158               | 5.29         | 5.14  | 3.00    | 3.14  | 96.65                | 3.25 |
| ITS2                  | 220               | 20.51        | 14.76 | 8.80    | 7.72  | 90.28                | 6.84 |
| 28SrDNA               | 3548              | 73.47        | 48.49 | 12.29   | 12.68 | 97.93                | 1.37 |
| Whole 48SrDNA cluster | 5847              | 106.13       | 69.60 | 27.31   | 22.84 | 98.18                | 1.19 |

SD = standard deviation

**Supplementary Table 12. Detected numbers of tRNA by tRNAscan-SE**

|                                     | tRNAs<br>decoding<br>Standard 20<br>AA | Selenocysteine<br>tRNAs (TCA) | Possible<br>suppressor<br>tRNAs<br>(CTA, TTA) | tRNAs with<br>undetermined/<br>unknown<br>isotypes | Predicted<br>pseudogenes | tRNAs<br>with<br>introns |
|-------------------------------------|----------------------------------------|-------------------------------|-----------------------------------------------|----------------------------------------------------|--------------------------|--------------------------|
| RIR17                               | 110                                    | 0                             | 1                                             | 17                                                 | 12                       | 37                       |
| <i>Rhizopus<br/>oryzae</i>          | 237                                    | 0                             | 0                                             | 0                                                  | 2                        | 12                       |
| <i>Phycomyces<br/>blakesleeanus</i> | 308                                    | 0                             | 1                                             | 0                                                  | 0                        | 12                       |
| <i>Mortierella<br/>elongata</i>     | 253                                    | 0                             | 0                                             | 2                                                  | 3                        | 12                       |
| <i>Abisporus<br/>varbisporus</i>    | 157                                    | 0                             | 0                                             | 0                                                  | 3                        | 91                       |
| <i>Saccharomyces<br/>cerevisiae</i> | 286                                    | 1                             | 0                                             | 2                                                  | 6                        | 59                       |
